# Supplementary material for: Characterization of Cissus quadrangularis L. (Veldt Grape) aerial fractions: Integrating nutritional and biophysical properties for functional food potential
Source: Research Square preprint supplement (doi:10.21203/rs.3.rs-8293427/v1), 2025-12-22
Supplement: Supplementary file 1 [file 7961d2bbbb83f32537ce590d.docx]

**SUPPLEMENTARY MATERIALS**

**Materials and Methods**

**Antinutritional factors**

**
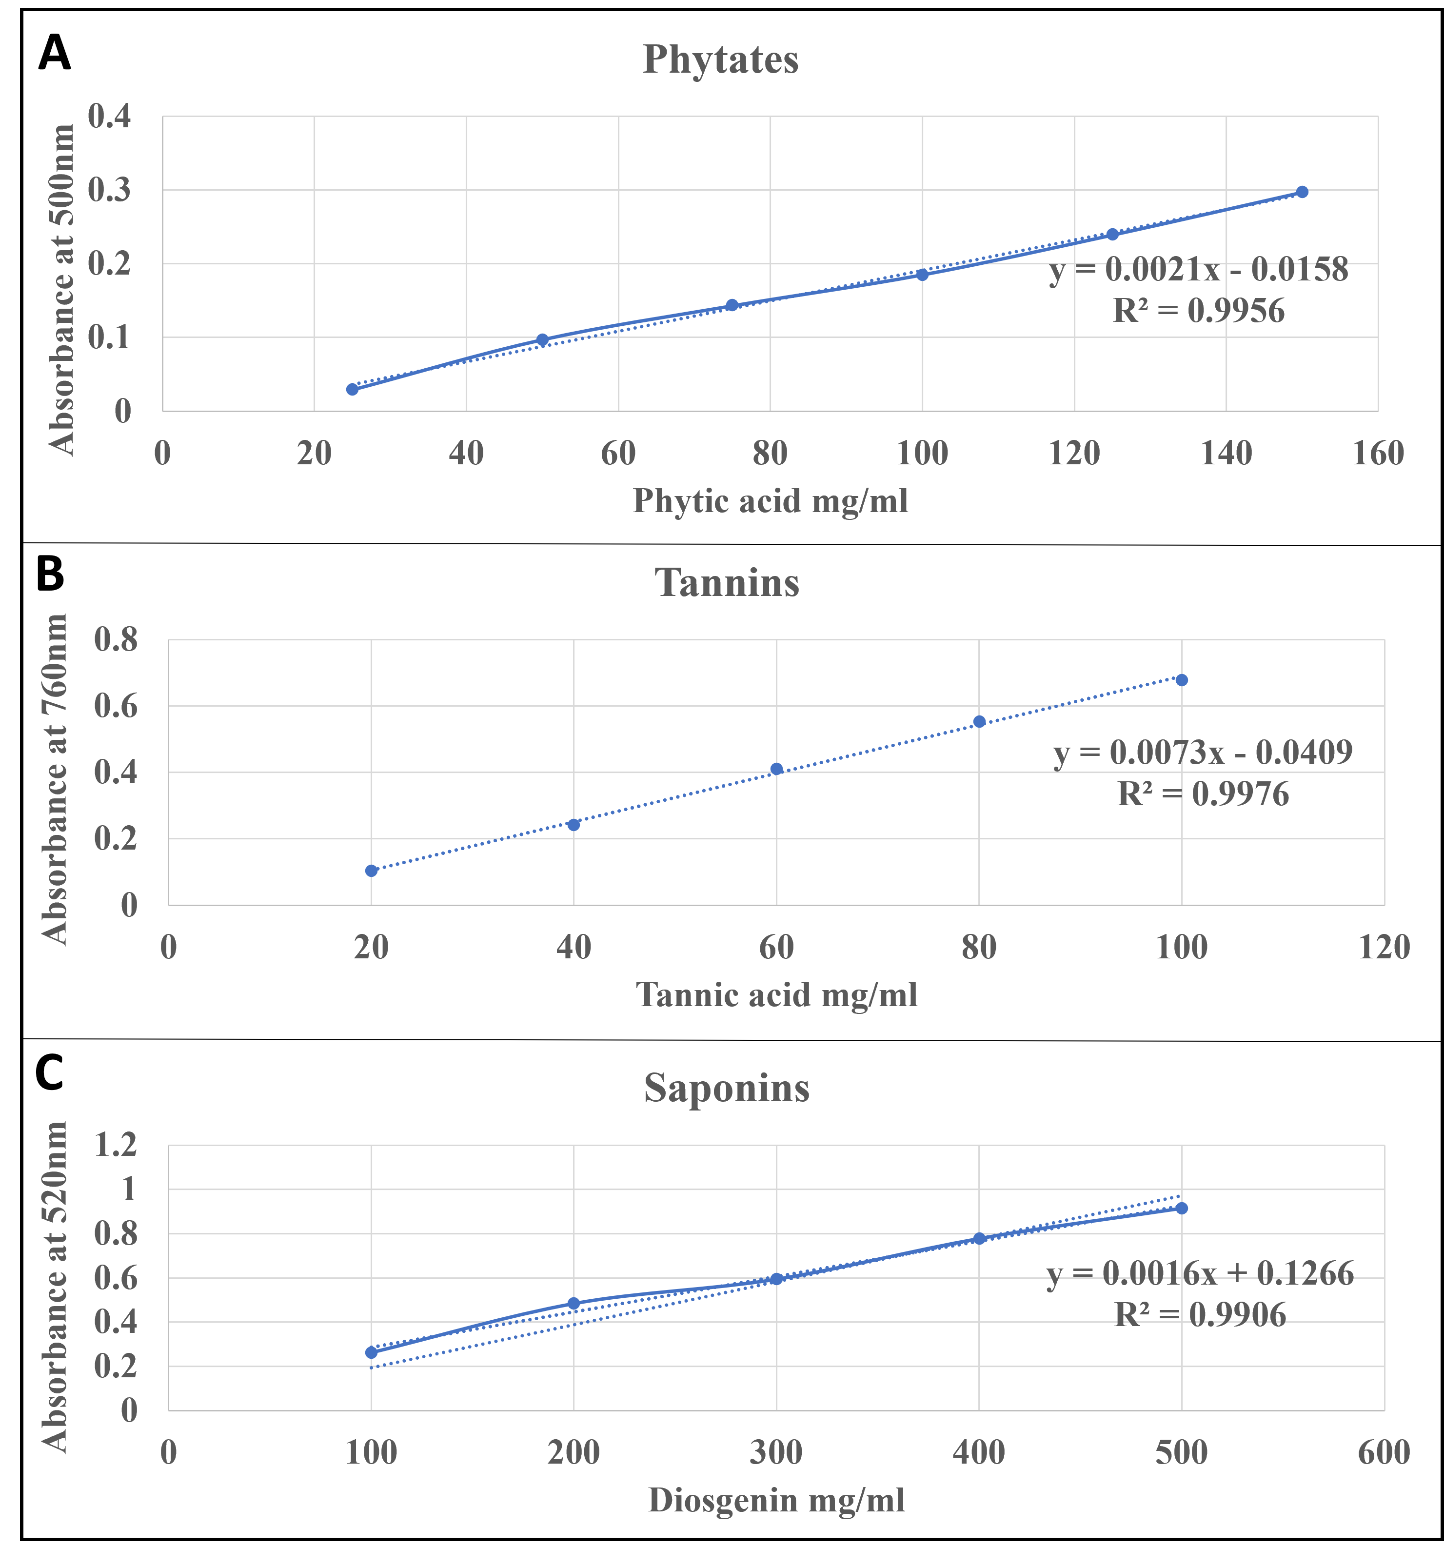
**

**Fig 1: Standard graph for antinutritional factors**


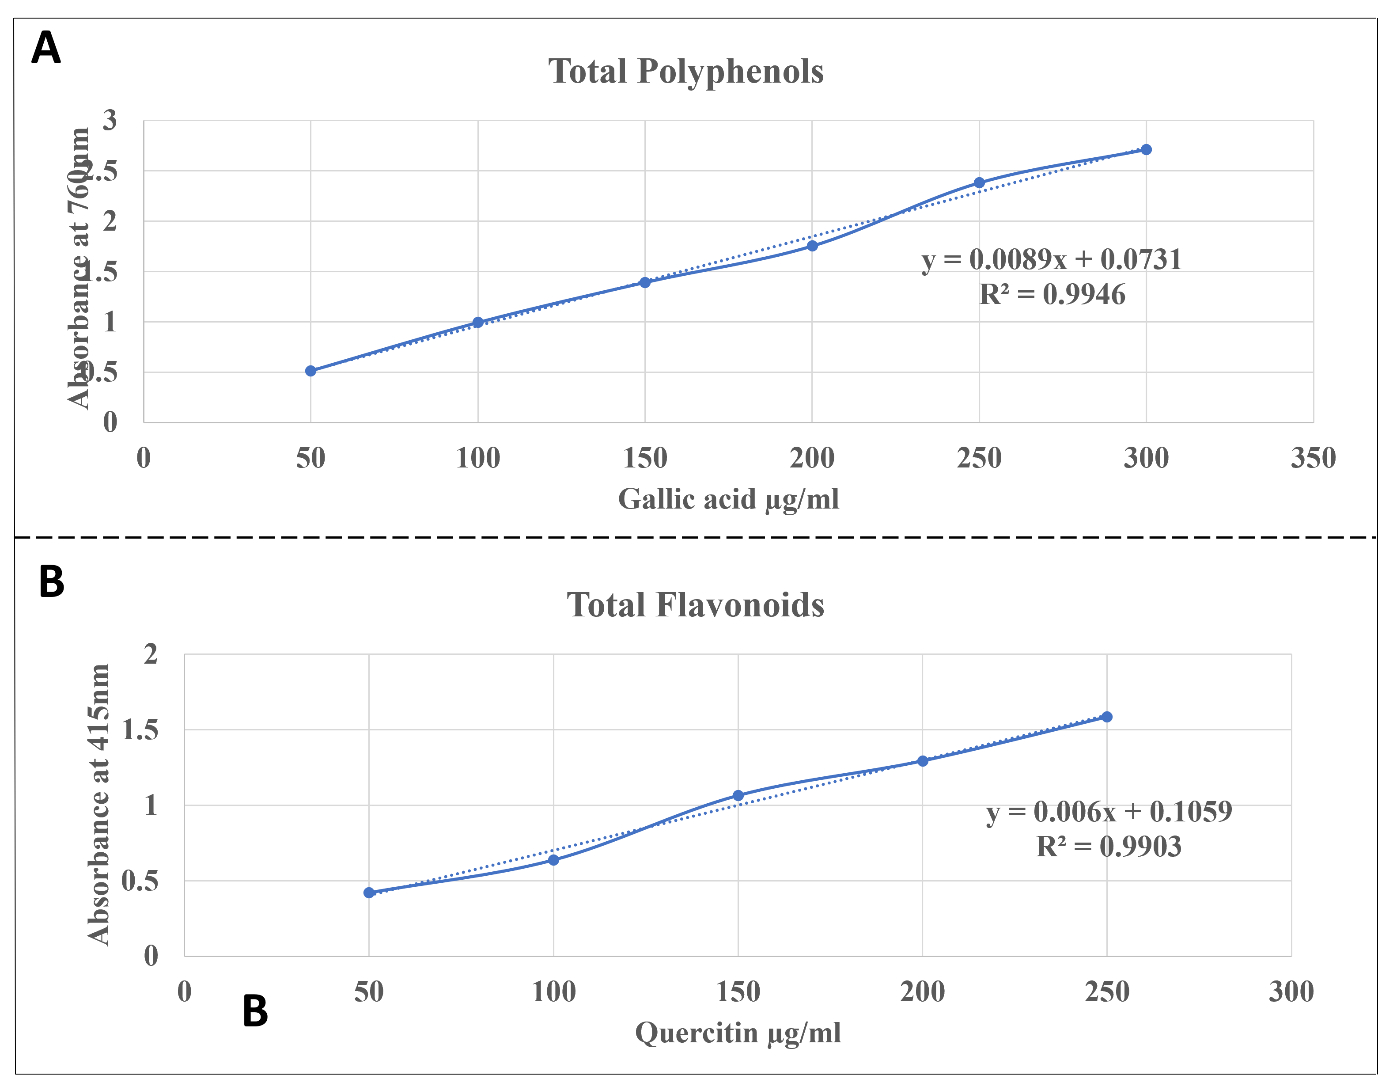


**Fig 2: Standard graph for Phytochemicals (TPC & TFC)**


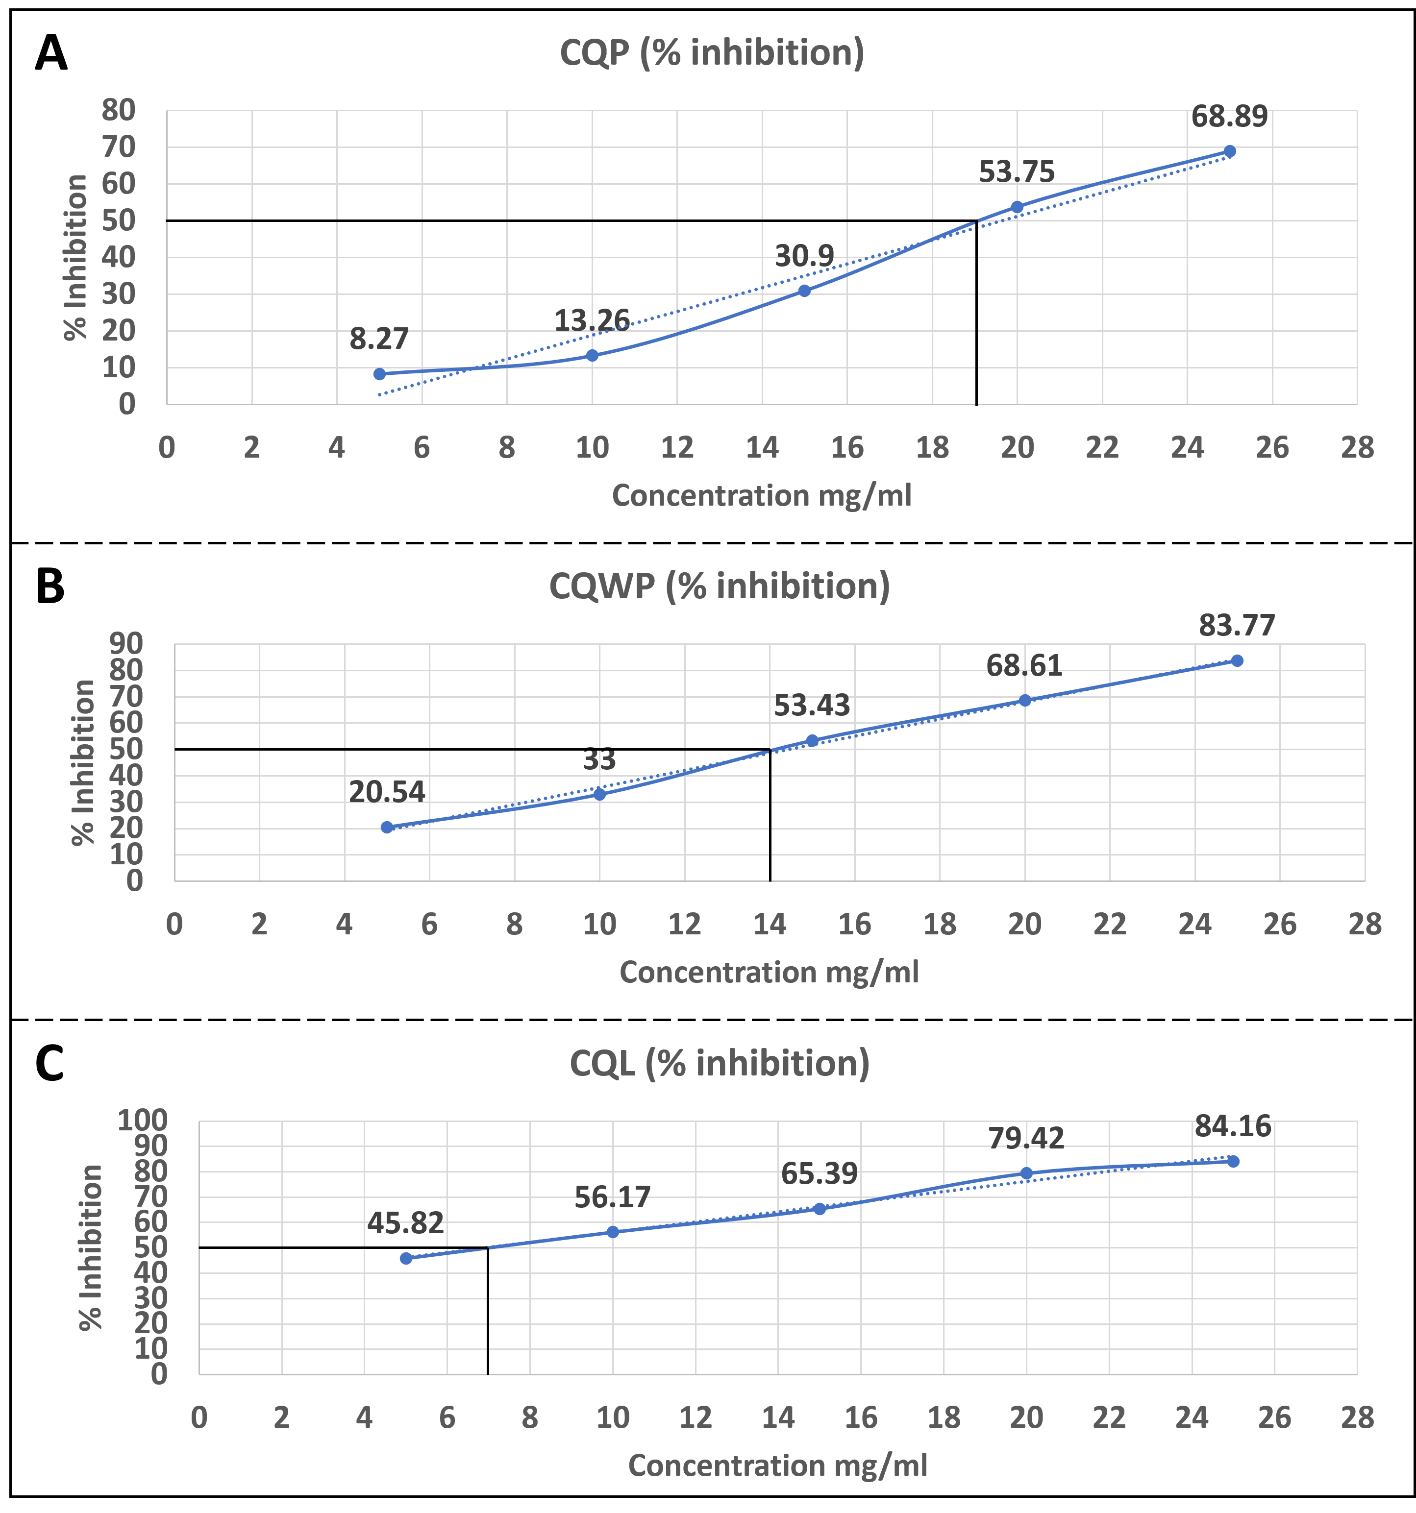


**Fig 3: IC50 Concentration of veldt grape aerial parts**
